# Supplementary material for: New open-framework cobalt sulfate-oxalates based on molecular and chain-like building blocks
Source: Royal Society of Chemistry journal article supplement (doi:10.1039/c4dt01503g), 2014-01-01
Supplement: c4dt01503g1.pdf [file c4dt01503g1.pdf]

## **New open-framework cobalt sulfate-oxalates based on molecular and chain-like building blocks**

Kangcai Wang,<sup>a</sup> Daibing Luo,<sup>b</sup> Dingguo Xu,<sup>\*a</sup> Furong Guo,<sup>a</sup> Lin Liu<sup>a</sup> and Zhien Lin<sup>\*a</sup>

<sup>a</sup> *College of Chemistry, Sichuan University, Chengdu 610064, People's Republic of China.*

<sup>b</sup> *Analytical & Testing Center, Sichuan University, Chengdu 610064, People's Republic of China.*

\* To whom correspondence should be addressed. Tel: +86-28-85412284. E-mail: dgxu@scu.edu.cn; zhienlin@scu.edu.cn

### Physical measurements:

IR spectra (KBr pellets) were recorded on a Nicolet Impact 410 FTIR spectrometer. Powder X-ray diffraction (XRD) data were obtained using a Rigaku D/MAX-rA diffractometer with Cu-K $\alpha$  radiation ( $\lambda = 1.5418 \text{ \AA}$ ). The thermogravimetric analyses were performed on a Netzsch STA 449c analyzer in a flow of N<sub>2</sub> with a heating rate of 10 °C/min. Single crystal X-ray diffraction data were collected on an Oxford Xcalibur diffractometer with graphite-monochromated MoK $\alpha$  ( $\lambda = 0.71073 \text{ \AA}$ ) at room temperature. The crystal structures were solved by direct methods. The structures were refined on  $F^2$  by full-matrix least-squares methods using the *SHELXTL* program package.<sup>1</sup> The crystallographic data for compounds **3-4** are summarized in Table 1. Selected bond lengths for compounds **3-4** are listed in Tables 2 and 3.

### Reference

1. G. M. Sheldrick, Acta Cryst., Sect. A, 2008, 64, 112.

### Synthesis

**Synthesis of Co<sub>2</sub>(Hdeta)(H<sub>2</sub>O)<sub>2</sub>(SO<sub>4</sub>)(C<sub>2</sub>O<sub>4</sub>)<sub>1.5</sub> (1):** A mixture of CoSO<sub>4</sub>·7H<sub>2</sub>O (0.281 g), H<sub>2</sub>C<sub>2</sub>O<sub>4</sub>·2H<sub>2</sub>O (0.126 g), and diethylenetriamine (0.103 g) was sealed in a Teflon-lined stainless steel autoclave and heated at 150 °C for 8 d. The autoclave was subsequently allowed to cool to room temperature. Red crystals were recovered by filtration, washed with distilled water, and finally dried at ambient temperature (43.6 % yield based on cobalt).

**Synthesis of Co<sub>1.5</sub>(Haep)(SO<sub>4</sub>)(C<sub>2</sub>O<sub>4</sub>) (2):** A mixture of CoSO<sub>4</sub>·7H<sub>2</sub>O (0.422 g), H<sub>2</sub>C<sub>2</sub>O<sub>4</sub>·2H<sub>2</sub>O (0.126 g), and 1-(2-aminoethyl)piperazine (0.129 g) was sealed in a Teflon-lined stainless steel autoclave and heated at 170 °C for 7 d. The autoclave was subsequently

allowed to cool to room temperature. Red crystals were recovered by filtration, washed with distilled water, and finally dried at ambient temperature (44.3 % yield based on cobalt).

**Synthesis of  $\text{H}_3\text{aep} \cdot \text{Co}_{1.5}(\text{H}_2\text{O})_3(\text{ox})_{1.5} \cdot 2\text{H}_2\text{O} \cdot 1.5\text{SO}_4$  (3):** A mixture of  $\text{CoSO}_4 \cdot 7\text{H}_2\text{O}$  (0.281 g),  $\text{H}_2\text{C}_2\text{O}_4 \cdot 2\text{H}_2\text{O}$  (0.189 g), and 1-(2-aminoethyl)piperazine (0.129 g) was sealed in a Teflon-lined stainless steel autoclave and heated at 170 °C for 8 d. The autoclave was subsequently allowed to cool to room temperature. Red crystals together with a large amount of unidentified pink powders were recovered by filtration, washed with distilled water, and finally dried at ambient temperature.

**Synthesis of  $\text{Ni}(\text{Hdeta})_2(\text{SO}_4)_2$  (4):** A mixture of  $\text{NiSO}_4 \cdot 7\text{H}_2\text{O}$  (0.569 g),  $\text{H}_2\text{SO}_4$  (0.201 g, 98 wt%),  $\text{H}_2\text{C}_2\text{O}_4 \cdot 2\text{H}_2\text{O}$  (0.126 g), and diethylenetriamine (0.309 g) was sealed in a Teflon-lined stainless steel autoclave and heated at 170 °C for 9 d. The autoclave was subsequently allowed to cool to room temperature. Blue crystals were recovered by filtration, washed with distilled water, and finally dried at ambient temperature (21.2 % yield based on nickel).

Table 1. Reaction compositions and crystallization conditions for  $\text{Co}_2(\text{Hdeta})(\text{H}_2\text{O})_2(\text{SO}_4)(\text{C}_2\text{O}_4)_{1.5}$  (**1**)

| run | reactants (molar ratio)                   |                                                            |      | crystallization conditions |             | product             |
|-----|-------------------------------------------|------------------------------------------------------------|------|----------------------------|-------------|---------------------|
|     | $\text{CoSO}_4 \cdot 7\text{H}_2\text{O}$ | $\text{H}_2\text{C}_2\text{O}_4 \cdot 2\text{H}_2\text{O}$ | deta | T (°C)                     | Time (days) |                     |
| 1   | 1                                         | 1                                                          | 1    | 150                        | 8           | Compound <b>1</b>   |
| 2   | 1                                         | 1.5                                                        | 1    | 150                        | 8           | unidentified powder |
| 3   | 1                                         | 2                                                          | 1    | 150                        | 8           | unidentified powder |
| 4   | 2                                         | 1                                                          | 1    | 150                        | 8           | unidentified powder |
| 5   | 2                                         | 1.5                                                        | 1    | 150                        | 8           | unidentified powder |
| 6   | 2                                         | 2                                                          | 1    | 150                        | 8           | unidentified powder |

Table 2. Reaction compositions and crystallization conditions for  $\text{Co}_{1.5}(\text{Haep})(\text{SO}_4)(\text{C}_2\text{O}_4)$  (**2**)

| run | reactants (molar ratio)                   |                                                            |     | crystallization conditions |             | product             |
|-----|-------------------------------------------|------------------------------------------------------------|-----|----------------------------|-------------|---------------------|
|     | $\text{CoSO}_4 \cdot 7\text{H}_2\text{O}$ | $\text{H}_2\text{C}_2\text{O}_4 \cdot 2\text{H}_2\text{O}$ | aep | T (°C)                     | Time (days) |                     |
| 1   | 1                                         | 1                                                          | 1   | 170                        | 8           | Compound <b>2</b>   |
| 2   | 1                                         | 1.5                                                        | 1   | 170                        | 8           | Compound <b>3</b>   |
| 3   | 1                                         | 2                                                          | 1   | 170                        | 8           | unidentified powder |
| 4   | 1.5                                       | 1                                                          | 1   | 170                        | 8           | Compound <b>2</b>   |
| 5   | 1.5                                       | 1.5                                                        | 1   | 170                        | 8           | Compound <b>2</b>   |
| 6   | 1.5                                       | 2                                                          | 1   | 170                        | 8           | unidentified powder |
| 7   | 2                                         | 1                                                          | 1   | 170                        | 8           | Compound <b>2</b>   |
| 8   | 2                                         | 1.5                                                        | 1   | 170                        | 8           | unidentified powder |

Table 3. Crystal data and structure refinement for compounds **3** and **4**

|                                                                                           | <b>3</b>                                                                                         | <b>4</b>                                                                      |
|-------------------------------------------------------------------------------------------|--------------------------------------------------------------------------------------------------|-------------------------------------------------------------------------------|
| Empirical formula                                                                         | C <sub>9</sub> H <sub>28</sub> Co <sub>1.5</sub> N <sub>3</sub> O <sub>16</sub> S <sub>1.5</sub> | C <sub>8</sub> H <sub>28</sub> N <sub>6</sub> N O <sub>8</sub> S <sub>2</sub> |
| Formula weight                                                                            | 570.83                                                                                           | 459.19                                                                        |
| Crystal system                                                                            | Triclinic                                                                                        | Monoclinic                                                                    |
| Space group                                                                               | <i>P</i> -1 (No.2)                                                                               | <i>P</i> 2 <sub>1</sub> /c (No.14)                                            |
| <i>a</i> , Å                                                                              | 8.4423(6)                                                                                        | 8.1281(4)                                                                     |
| <i>b</i> , Å                                                                              | 9.2757(8)                                                                                        | 10.5438(4)                                                                    |
| <i>c</i> , Å                                                                              | 13.2415(8)                                                                                       | 10.1264(6)                                                                    |
| $\alpha$ , degree                                                                         | 92.184(7)                                                                                        | 90                                                                            |
| $\beta$ , degree                                                                          | 95.486(5)                                                                                        | 98.720(4)                                                                     |
| $\gamma$ , degree                                                                         | 92.025(7)                                                                                        | 90                                                                            |
| Volume, Å <sup>3</sup>                                                                    | 1030.63(13)                                                                                      | 857.81(7)                                                                     |
| <i>Z</i>                                                                                  | 2                                                                                                | 2                                                                             |
| <i>D</i> <sub>c</sub> , g/cm <sup>3</sup>                                                 | 1.839                                                                                            | 1.778                                                                         |
| $\mu$ (Mo-K $\alpha$ ), mm <sup>-1</sup>                                                  | 1.458                                                                                            | 1.427                                                                         |
| Reflections collected                                                                     | 7621                                                                                             | 3458                                                                          |
| Independent reflections                                                                   | 3616                                                                                             | 1506                                                                          |
| Final <i>R</i> <sub>1</sub> , <i>wR</i> <sub>2</sub> [ <i>I</i> >2 $\sigma$ ( <i>I</i> )] | 0.0619, 0.1850                                                                                   | 0.0315, 0.0750                                                                |

Table 4. Select bond lengths (Å) for compound **3**<sup>a</sup>

|              |          |              |           |
|--------------|----------|--------------|-----------|
| Co(1)-OW2    | 2.053(3) | Co(2)-O(2)#2 | 2.139(3)  |
| Co(1)-OW1    | 2.058(4) | Co(2)-O(2)   | 2.139(3)  |
| Co(1)-O(3)   | 2.085(3) | S(1)-O(8)    | 1.456(4)  |
| Co(1)-O(5)   | 2.108(4) | S(1)-O(9)    | 1.470(4)  |
| Co(1)-O(6)#1 | 2.118(3) | S(1)-O(10)   | 1.474(4)  |
| Co(1)-O(1)   | 2.158(4) | S(1)-O(7)    | 1.475(4)  |
| Co(2)-OW3    | 2.062(3) | S(2)-O(12)   | 1.365(17) |
| Co(2)-OW3#2  | 2.062(3) | S(2)-O(14)   | 1.386(15) |
| Co(2)-O(4)#2 | 2.078(3) | S(2)-O(11)   | 1.456(12) |
| Co(2)-O(4)   | 2.078(4) | S(2)-O(13)   | 1.571(15) |

<sup>a</sup> Symmetry transformations used to generate equivalent atoms: #1 -x+1,-y+1,-z;  
#2 -x+1,-y,-z+1.

Table 5. Select bond lengths (Å) for compound **4**<sup>a</sup>

|              |            |              |            |
|--------------|------------|--------------|------------|
| Ni(1)-N(1)   | 2.092(2)   | Ni(1)-O(1)#1 | 2.2015(17) |
| Ni(1)-N(1)#1 | 2.092(2)   | S(1)-O(3)    | 1.463(2)   |
| Ni(1)-N(2)#1 | 2.114(2)   | S(1)-O(4)    | 1.470(2)   |
| Ni(1)-N(2)   | 2.114(2)   | S(1)-O(2)    | 1.4701(19) |
| Ni(1)-O(1)   | 2.2015(17) | S(1)-O(1)    | 1.4980(19) |

<sup>a</sup> Symmetry transformations used to generate equivalent atoms: #1 -x+1,-y+1,-z+2.

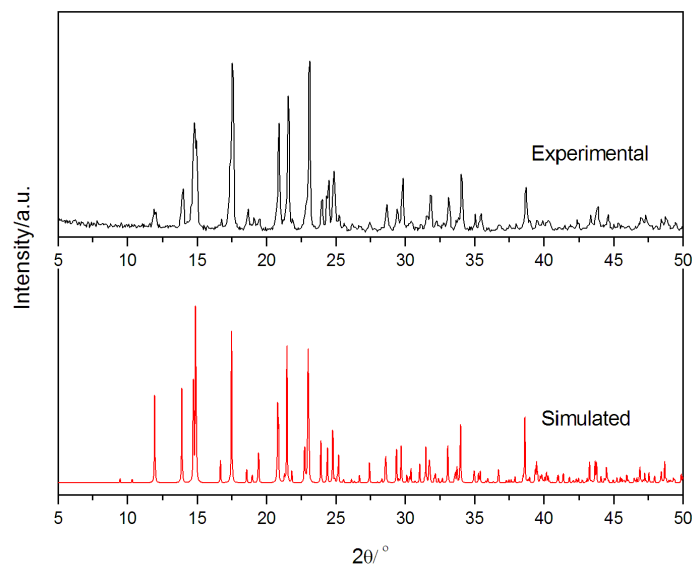

**Fig. S1.** Experimental and simulated powder XRD patterns of compound **1**.

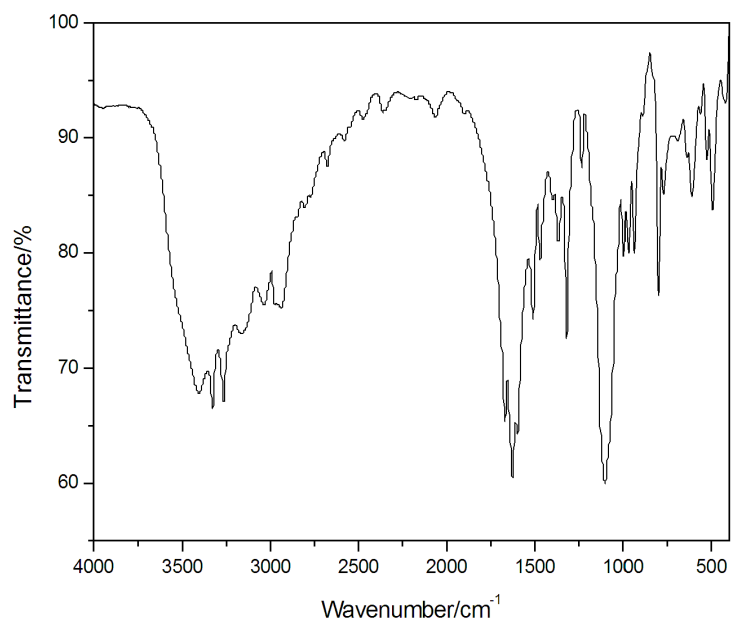

**Fig. S2.** IR spectrum of compound **1**.

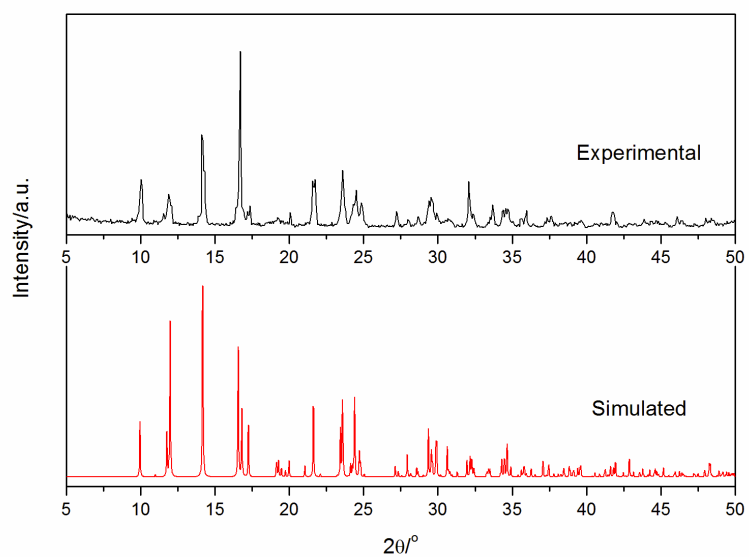

**Fig. S3.** Experimental and simulated powder XRD patterns of compound **2**.

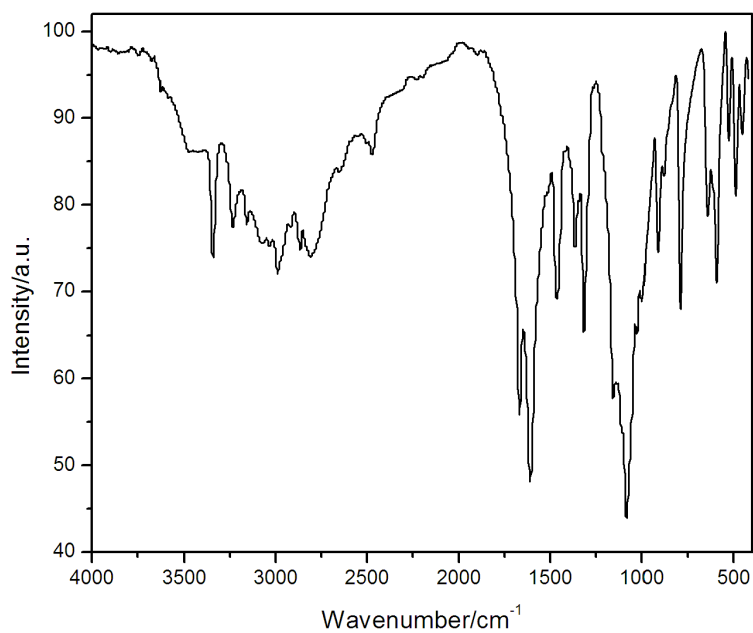

**Fig. S4.** IR spectrum of compound **2**.

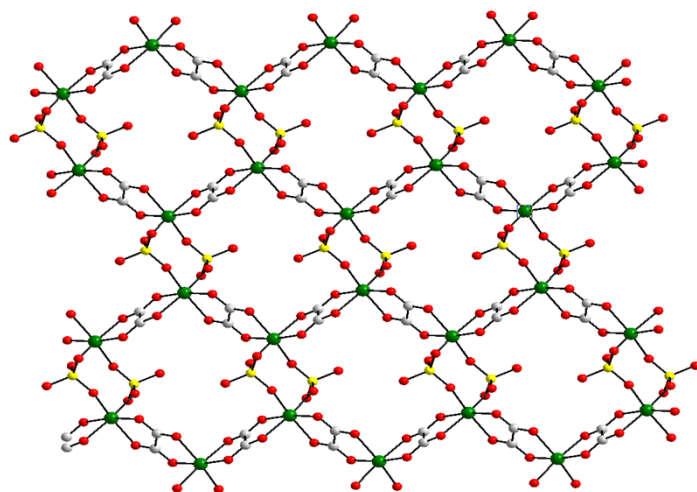

**Fig. S5.** The cobalt sulfate-oxalate layer present in the structure of compound **2**.

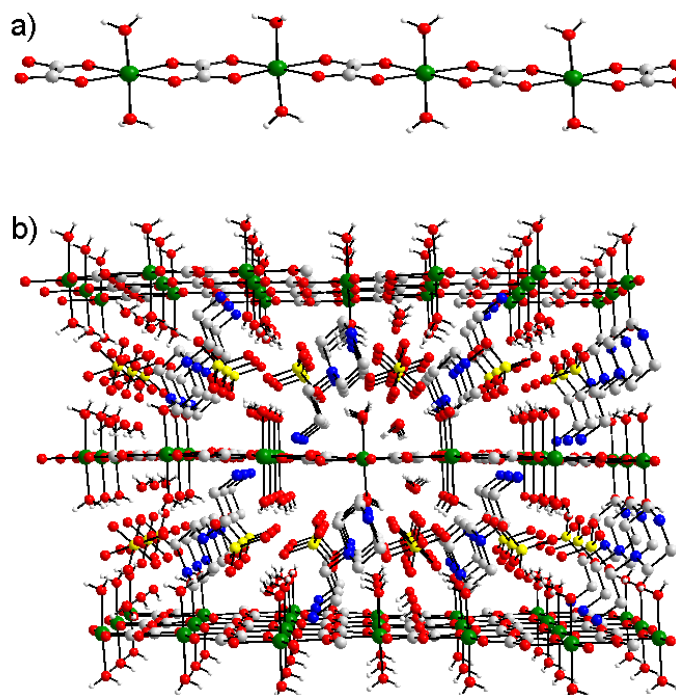

**Fig. S6.** (a) A view of the  $\text{Co}(\text{H}_2\text{O})_2(\text{ox})$  chain in compound **3**; (b) A perspective view of the structure of **3**.

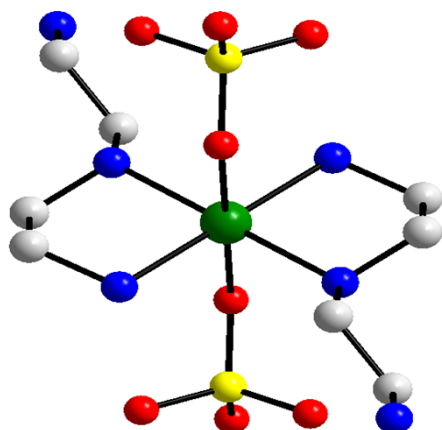

**Fig. S7.** The molecular structure of compound **4**. Color code: nickel, green; sulfur, yellow; oxygen, red; nitrogen, blue; carbon, gray.

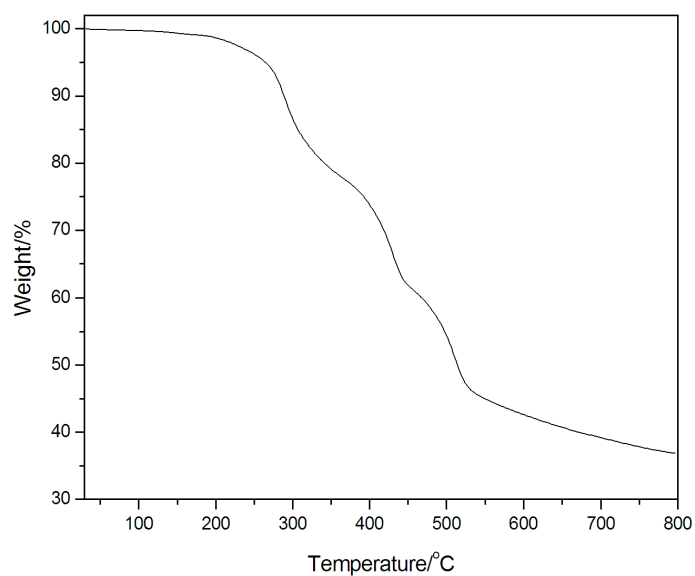

**Fig. S8.** TGA curve of compound **1**.

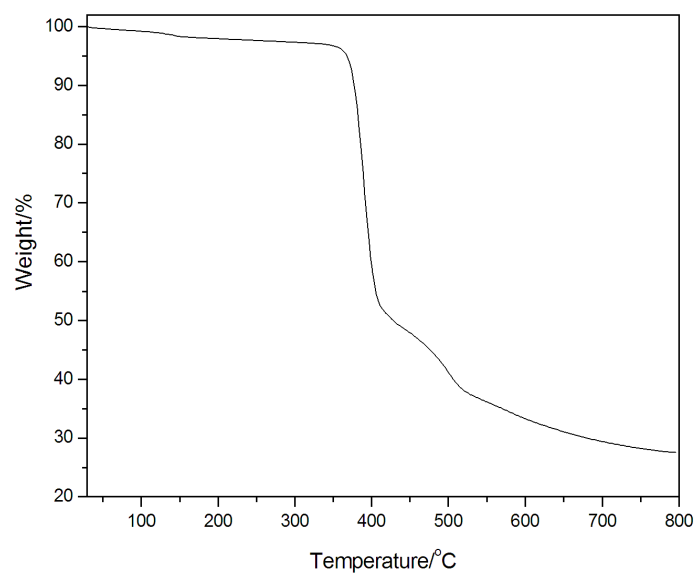

**Fig. S9.** TGA curve of compound **2**.

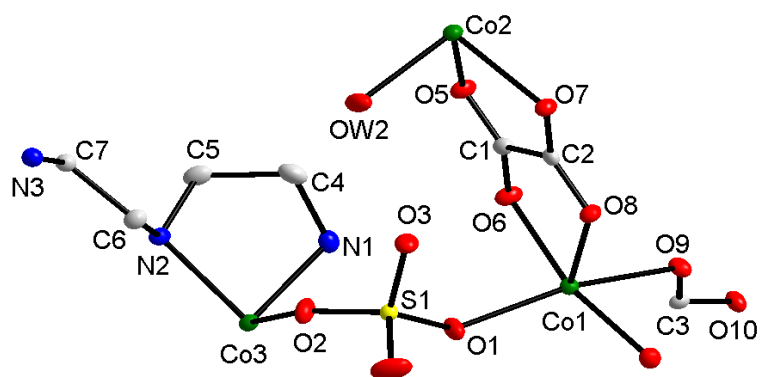

**Fig. S10.** ORTEP plot of the asymmetric unit of compound **1**, showing the labeling scheme and the 30% probability displacement ellipsoid.

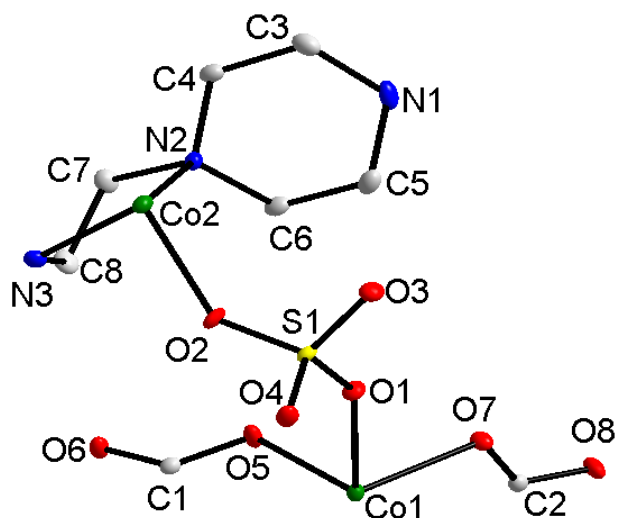

**Fig. S11.** ORTEP plot of the asymmetric unit of compound **2**, showing the labeling scheme and the 30% probability displacement ellipsoid.

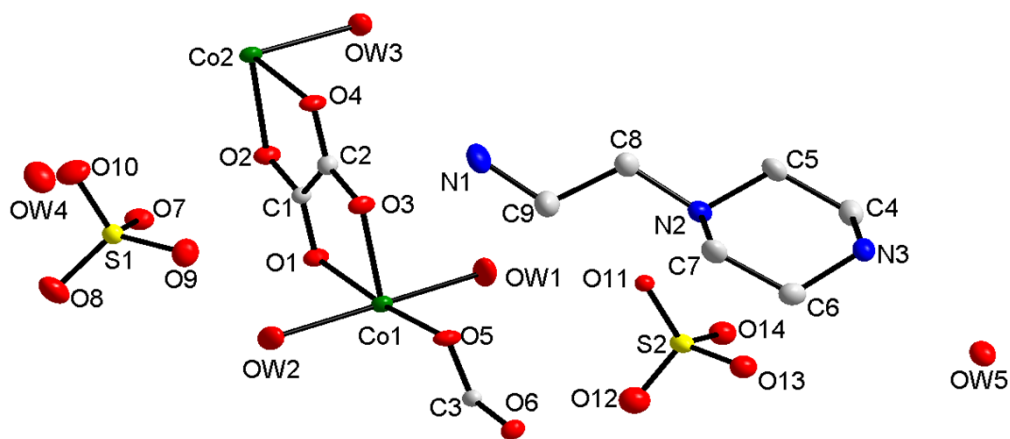

**Fig. S12.** ORTEP plot of the asymmetric unit of compound **3**, showing the labeling scheme and the 30% probability displacement ellipsoid.

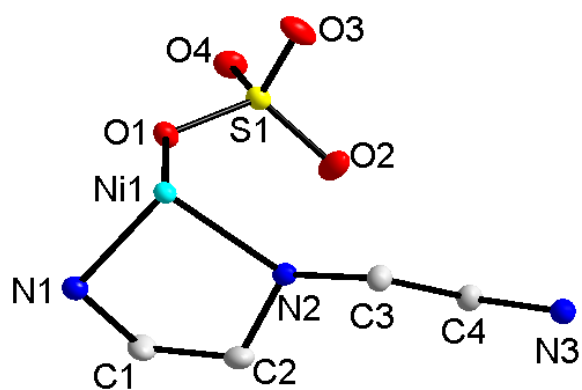

**Fig. S13.** ORTEP plot of the asymmetric unit of compound **4**, showing the labeling scheme and the 30% probability displacement ellipsoid.
